# Supplementary material for: Selective Maternal Seeding and Rearing Environment From Birth to Weaning Shape the Developing Piglet Gut Microbiome
Source: Front Microbiol. 2022 Apr 25;13:795101. doi: 10.3389/fmicb.2022.795101 (PMC9083071; doi:10.3389/fmicb.2022.795101)
Supplement: Supplementary Table 2 — The similarity of percentages analysis of Bray–Curtis dissimilarity between piglet feces at day 0 and vagina. [file Table_2.XLSX]

## Sheet: Sheet1
Table S2. Similarity of percentages analysis of Bray–Curtis dissimilarity between piglet feces at day 0 and vagina
Taxon	Av. dissim. %	Contrib. %	Cumulative %	% mean abundance	% mean abundance
				Piglet Feces Day 0	Vagina
Proteobacteria	4.03	30.32	30.33	27.2031	19.8161
Bacteroidetes	3.92	29.53	59.86	5.06875	12.8036
Firmicutes	2.33	17.53	77.38	57.15	56.4071
Actinobacteria	1.12	8.45	85.83	7.25625	5.57857
Tenericutes	0.65	4.86	90.7	0.8125	2.04107
Spirochaetes	0.45	3.35	94.05	0.2	1.01964
Fusobacteria	0.38	2.87	96.92	1.51875	1.65714
Cyanobacteria	0.2	1.53	98.45	0.58125	0.332143
Euryarchaeota	0.082	0.62	99.06	0.171875	0.135714
Synergistetes	0.052	0.39	99.45	0	0.108929
Verrucomicrobia	0.046	0.35	99.8	0.021875	0.0910714
WPS-2	0.012	0.09	99.89	0.00625	0.0214286
Crenarchaeota	0	0.05	99.93	0	0.00892857
[Thermi]	0	0.04	99.98	0.009375	0.00357143
Planctomycetes	0	0.02	100	0	0.00357143
